# Supplementary material
Source: HighWire-hosted journal article supplement (https://bmjopenrespres.bmj.com/content/11/1/e002161)
Supplement: inline-supplementary-material-1 [file inline-supplementary-material-1.pdf]

## 1 SEARCH STRATEGY

2 The full content of each string is reported below. PubMed database was searched, by inserting one  
3 string at the time on the research bar. No limitations or filters were set during our PubMed search.  
4 No backward time limitation was set, we included studies published up to September 10<sup>th</sup>, 2023.

5

6 PubMed Strings:

- 7 • *Riociguat*: ("lung diseases, interstitial"[MeSH Terms] OR ("lung"[All Fields] AND  
8 "diseases"[All Fields] AND "interstitial"[All Fields]) OR "interstitial lung diseases"[All  
9 Fields] OR ("interstitial"[All Fields] AND "lung"[All Fields] AND "diseases"[All Fields]))  
10 AND ("hypertension, pulmonary"[MeSH Terms] OR ("hypertension"[All Fields] AND  
11 "pulmonary"[All Fields]) OR "pulmonary hypertension"[All Fields] OR ("pulmonary"[All  
12 Fields] AND "hypertension"[All Fields])) AND ("riociguat"[Supplementary Concept] OR  
13 "riociguat"[All Fields]).
- 14 • *Sildenafil*: ("lung diseases, interstitial"[MeSH Terms] OR ("lung"[All Fields] AND  
15 "diseases"[All Fields] AND "interstitial"[All Fields]) OR "interstitial lung diseases"[All  
16 Fields] OR ("interstitial"[All Fields] AND "lung"[All Fields] AND "diseases"[All Fields]))  
17 AND ("hypertension, pulmonary"[MeSH Terms] OR ("hypertension"[All Fields] AND  
18 "pulmonary"[All Fields]) OR "pulmonary hypertension"[All Fields] OR ("pulmonary"[All  
19 Fields] AND "hypertension"[All Fields])) AND ("sildenafil citrate"[MeSH Terms] OR  
20 ("sildenafil"[All Fields] AND "citrate"[All Fields]) OR "sildenafil citrate"[All Fields] OR  
21 "sildenafil"[All Fields] OR "sildenafil s"[All Fields])
- 22 • *Tadalafil*: ("lung diseases, interstitial"[MeSH Terms] OR ("lung"[All Fields] AND  
23 "diseases"[All Fields] AND "interstitial"[All Fields]) OR "interstitial lung diseases"[All  
24 Fields] OR ("interstitial"[All Fields] AND "lung"[All Fields] AND "diseases"[All Fields]))  
25 AND ("hypertension, pulmonary"[MeSH Terms] OR ("hypertension"[All Fields] AND  
26 "pulmonary"[All Fields]) OR "pulmonary hypertension"[All Fields] OR ("pulmonary"[All

1 Fields] AND "hypertension"[All Fields])) AND ("tadalafil"[MeSH Terms] OR "tadalafil"[All  
2 Fields])

3 • *Bosentan*: ("lung diseases, interstitial"[MeSH Terms] OR ("lung"[All Fields] AND  
4 "diseases"[All Fields] AND "interstitial"[All Fields]) OR "interstitial lung diseases"[All  
5 Fields] OR ("interstitial"[All Fields] AND "lung"[All Fields] AND "diseases"[All Fields]))  
6 AND ("hypertension, pulmonary"[MeSH Terms] OR ("hypertension"[All Fields] AND  
7 "pulmonary"[All Fields]) OR "pulmonary hypertension"[All Fields] OR ("pulmonary"[All  
8 Fields] AND "hypertension"[All Fields])) AND ("bosentan"[MeSH Terms] OR  
9 "bosentan"[All Fields])

10 • *Macitentan*: ("lung diseases, interstitial"[MeSH Terms] OR ("lung"[All Fields] AND  
11 "diseases"[All Fields] AND "interstitial"[All Fields]) OR "interstitial lung diseases"[All  
12 Fields] OR ("interstitial"[All Fields] AND "lung"[All Fields] AND "diseases"[All Fields]))  
13 AND ("hypertension, pulmonary"[MeSH Terms] OR ("hypertension"[All Fields] AND  
14 "pulmonary"[All Fields]) OR "pulmonary hypertension"[All Fields] OR ("pulmonary"[All  
15 Fields] AND "hypertension"[All Fields])) AND ("macitentan"[Supplementary Concept] OR  
16 "macitentan"[All Fields])

17 • *Ambrisentan*: ("lung diseases, interstitial"[MeSH Terms] OR ("lung"[All Fields] AND  
18 "diseases"[All Fields] AND "interstitial"[All Fields]) OR "interstitial lung diseases"[All  
19 Fields] OR ("interstitial"[All Fields] AND "lung"[All Fields] AND "diseases"[All Fields]))  
20 AND ("hypertension, pulmonary"[MeSH Terms] OR ("hypertension"[All Fields] AND  
21 "pulmonary"[All Fields]) OR "pulmonary hypertension"[All Fields] OR ("pulmonary"[All  
22 Fields] AND "hypertension"[All Fields])) AND ("ambrisentan"[Supplementary Concept] OR  
23 "ambrisentan"[All Fields])

24 • *Treprostinil*: ("lung diseases, interstitial"[MeSH Terms] OR ("lung"[All Fields] AND  
25 "diseases"[All Fields] AND "interstitial"[All Fields]) OR "interstitial lung diseases"[All  
26 Fields] OR ("interstitial"[All Fields] AND "lung"[All Fields] AND "diseases"[All Fields]))

- 1 AND ("hypertension, pulmonary"[MeSH Terms] OR ("hypertension"[All Fields] AND  
2 "pulmonary"[All Fields]) OR "pulmonary hypertension"[All Fields] OR ("pulmonary"[All  
3 Fields] AND "hypertension"[All Fields])) AND ("treprostinil"[Supplementary Concept] OR  
4 "treprostinil"[All Fields])
- 5 • *Iloprost*: ("lung diseases, interstitial"[MeSH Terms] OR ("lung"[All Fields] AND  
6 "diseases"[All Fields] AND "interstitial"[All Fields]) OR "interstitial lung diseases"[All  
7 Fields] OR ("interstitial"[All Fields] AND "lung"[All Fields] AND "diseases"[All Fields]))  
8 AND ("hypertension, pulmonary"[MeSH Terms] OR ("hypertension"[All Fields] AND  
9 "pulmonary"[All Fields]) OR "pulmonary hypertension"[All Fields] OR ("pulmonary"[All  
10 Fields] AND "hypertension"[All Fields])) AND ("iloprost"[MeSH Terms] OR "iloprost"[All  
11 Fields])
  - 12 • *Selexipag*: ("hypertension, pulmonary"[MeSH Terms] OR ("hypertension"[All Fields] AND  
13 "pulmonary"[All Fields]) OR "pulmonary hypertension"[All Fields] OR ("pulmonary"[All  
14 Fields] AND "hypertension"[All Fields])) AND ("selexipag"[Supplementary Concept] OR  
15 "selexipag"[All Fields])
  - 16 • *Isosorbide*: ("hypertension, pulmonary"[MeSH Terms] OR ("hypertension"[All Fields] AND  
17 "pulmonary"[All Fields]) OR "pulmonary hypertension"[All Fields] OR ("pulmonary"[All  
18 Fields] AND "hypertension"[All Fields])) AND ("isosorbide"[All Fields] OR  
19 "isosorbide"[MeSH Terms] OR "isosorbide"[All Fields])

20

21 ClinicalTrials.gov was also employed to search for clinical trials. The words of [*vasoactive drug*] (in  
22 eg., riociguat) and "*pulmonary hypertension*" were inserted in the research string panel for each  
23 vasoactive drug. The resulting clinical trials were then considered for screening if their status was  
24 addressed as "completed with results". No backward time limitation was set, we included studies  
25 published up to September 10<sup>th</sup>, 2023.

26

1 ClinicalTrial.gov string panel:

- 2 • *Riociguat* ("intervention/treatment") AND *pulmonary hypertension* ("condition/disease")
- 3 • *Sildenafil* ("intervention/treatment") AND *pulmonary hypertension* ("condition/disease")
- 4 • *Tadalafil* ("intervention/treatment") AND *pulmonary hypertension* ("condition/disease")
- 5 • *Bosentan* ("intervention/treatment") AND *pulmonary hypertension* ("condition/disease")
- 6 • *Macitentan* ("intervention/treatment") AND *pulmonary hypertension* ("condition/disease")
- 7 • *Ambrisentan* ("intervention/treatment") AND *pulmonary hypertension* ("condition/disease")
- 8 • *Treprostinil* ("intervention/treatment") AND *pulmonary hypertension* ("condition/disease")
- 9 • *Iloprost* ("intervention/treatment") AND *pulmonary hypertension* ("condition/disease")
- 10 • *Selexipag* ("intervention/treatment") AND *pulmonary hypertension* ("condition/disease")
- 11 • *Isosorbide* ("intervention/treatment") AND *pulmonary hypertension* ("condition/disease")

12

13

14
